# Supplementary material for: Glycemic control determines the response to immunotherapy for hepatocellular carcinoma in subjects with diabetes
Source: Research Square preprint supplement (doi:10.21203/rs.3.rs-6880898/v1), 2025-06-18
Supplement: Supplementary file 1 [file fbf543d7598483ab35ddb588.docx]

**Table S1. Baseline characteristics of patients with unresectable HCC who received immunotherapy**

|  |  | Diabetes | |  |
| --- | --- | --- | --- | --- |
| Characteristics | No diabetes (N=83) | Well-controlled (N=37) | Poorly-controlled  (N=31) | *P* |
| **Male, no. (%)** | 66 (79.5) | 27 (73.0) | 22 (71.0) | 0.554 |
| **Age, year, median (IQR)** | 64.7±10.8 | 67.3±11.4 | 72.1 ± 8.1 | 0.004 |
| **Body-mass index, kg/m2** | 23.8 ± 3.4 | 24.9 ± 4.5 | 24.2 ± 3.5 | 0.322 |
| **Performance score, no. (%)** |  |  |  | 0.529 |
| ECOG 0-1 | 70 (84.3) | 34 (91.9) | 27 (87.1) |  |
| ECOG≧2 | 13 (15.7) | 3 (8.1) | 4 (12.9) |  |
| **Comorbidities, no. (%)** |  |  |  |  |
| Hypertension | 33 (39.8) | 19 (51.4) | 20 (64.5) | 0.055 |
| Cardiovascular disease | 16 (19.3) | 8 (21.6) | 11 (35.5) | 0.183 |
| GFR < 45 or ESRD | 6 (7.2) | 5 (13.5) | 4 (12.9) | 0.469 |
| **Current/past smoker, no. (%)** | 38 (45.8) | 13 (35.1) | 12 (38.7) | 0.512 |
| **Drinking status, no. (%)** |  |  |  | 0.318 |
| Never | 66 (79.5) | 26 (70.3) | 21 (67.7) |  |
| Ever | 12 (14.5) | 7 (18.9) | 9 (29.0) |  |
| Current | 5 (6.0) | 4 (10.8) | 1 (3.2) |  |
| **Etiology of HCC, no. (%)** |  |  |  | 0.089 |
| Chronic hepatitis B | 53 (63.9) | 25 (67.6) | 19 (61.3) |  |
| Chronic hepatitis C | 22 (26.5) | 6 (16.2) | 3 (9.7) |  |
| Alcoholic hepatitis | 4 (4.8) | 2 (5.4) | 2 (6.5) |  |
| MASH | 4 (4.8) | 4 (10.8) | 7 (22.6) |  |
| **Child-Pugh class, no. (%)** |  |  |  | 0.596 |
| A | 73 (88.0) | 34 (91.9) | 26 (83.9) |  |
| B | 10 (12.0) | 3 (8.1) | 5 (16.1) |  |
| **BCLC stage, no. (%)** |  |  |  | 0.398 |
| B | 31 (37.3) | 8 (21.6) | 9 (29.0) |  |
| C | 51 (61.4) | 29 (78.4) | 22 (71.0) |  |
| D | 1 (1.2) | 0 (0.0) | 0 (0.0) |  |
| **Macrovascular invasion, no. (%)** | 28 (33.7) | 17 (45.9) | 8 (25.8) | 0.207 |
| IVC | 7 (8.4) | 3 (8.1) | 0 (0.0) |  |
| Vp3 | 10 (12.0) | 6 (16.2) | 3 (9.7) |  |
| Vp4 | 23 (27.7) | 14 (37.8) | 8 (25.8) |  |
| **Extrahepatic spread, no. (%)** | 27 (32.5) | 13 (35.1)) | 16 (51.6) | 0.165 |
| **Exceeded the Up-to-Seven Criteria, no. (%)** | 35 (42.2) | 17 (45.9) | 16 (51.6) | 0.660 |
| **CLIP** |  |  |  | 0.677 |
| 0-1 | 37 (44.6) | 16 (43.2) | 11 (35.5) |  |
| ≥ 2 | 46 (55.4) | 21 (56.8) | 20 (64.5) |  |
| **Modified albumin-bilirubin grade** |  |  |  | 0.202 |
| 1 | 52 (62.7) | 17 (45.9) | 15 (48.4) |  |
| 2a | 16 (19.3) | 9 (24.3) | 5 (16.1) |  |
| 2b | 12 (14.5) | 10 (27.0) | 11 (35.5) |  |
| 3 | 3 (3.6) | 1 (2.7) | 0 (0.0) |  |
| **Medication for diabetes** |  |  |  |  |
| Metformin, yes, no. (%) |  | 21 (56.8) | 18 (58.1) | 0.914 |
| Insulin, yes, no. (%) |  | 2 (5.4) | 7 (22.6) | 0.037 |
| Other OAD, yes, no. (%) |  | 23 (62.2) | 18 (58.1) | 0.731 |
| **Previous therapy before immunotherapy, no. (%)** | 61 (74.4) | 28 (80) | 20 (64.5) | 0.353 |
| Surgery, yes, no. (%) | 33 (39.8) | 12 (32.4) | 10 (32.3) | 0.642 |
| TACE, yes, no. (%) | 33 (39.8) | 15 (40.5) | 11 (35.5) | 0.897 |
| RFA/PEI, yes, no. (%) | 19 (22.9) | 9 (24.3) | 2 (6.5) | 0.108 |
| HAIC, yes, no. (%) | 24 (28.9) | 10 (27.0) | 9 (29.0) | 0.975 |
| TKI, yes, no. (%) | 13 (15.7) | 7 (18.9) | 9 (29.0) | 0.449 |
| **Immunotherapy as systemic line, no. (%)** |  |  |  | 0.272 |
| 1st line | 70 (84.3) | 30 (81.1) | 22 (71.0) |  |
| ≥ 2nd line | 13 (15.7) | 7 (18.9) | 9 (29.0) |  |
| **Combination therapy with immunotherapy, no. (%)** |  |  |  |  |
| HAIC | 37 (44.6) | 10 (27.0) | 8 (25.8) | 0.071 |
| TACE | 8 (9.6) | 4 (10.8) | 3 (9.7) | 0.979 |
| **Laboratory data, median (IQR)** |  |  |  |  |
| HbA1c, % | 5.5 ± 0.6 | 6.2 ± 0.5 | 7.8 ± 1.4 | < 0.001 |
| Alpha-fetoprotein, µg/L | 5610.4 ± 15102.0 | 3880.3 ± 10901.4 | 1287.9 ± 4633.9 | 0.263 |
| Serum creatinine, µmol/L | 88.4 ± 70.7 | 79.6 ± 35.4 | 79.6 ± 25.6 | 0.880 |
| Serum albumin, µmol/L | 58.7 ± 7.5 | 57.1 ± 9.0 | 55.6 ± 9.0 | 0.060 |
| Total bilirubin, µmol/L | 17.1±32.5 | 13.7 ± 10.3 | 11.9±6.8 | 0.674 |
| INR | 1.2 ± 0.1 | 1.2 ± 0.1 | 1.1 ± 0.1 | 0.643 |
| Platelet, 109/L | 196.3 ± 112.7 | 166.8 ± 86.0 | 187.5 ± 83.7 | 0.342 |
| Total cholesterol, mmol/L | 4.5 ± 1.1 | 4.0 ± 1.0 | 4.3 ± 1.3 | 0.346 |
| HDL, mmol/L | 1.2 ± 0.5 | 1.4± 0.5 | 1.1± 0.3 | 0.117 |
| LDL, mmol/L | 2.9 ± 0.9 | 2.6 ± 0.9 | 2.7 ± 1.2 | 0.360 |
| Triglyceride, mmol/L | 3.1 ± 1.7 | 2.7 ± 1.4 | 2.9 ± 1.2 | 0.535 |

BCLC, Barcelona Clinic Liver Cancer; CLIP, Cancer of the Liver Italian Program; ECOG, Eastern Cooperative Oncology Group; ESRD, End-stage renal disease; GFR, glomerular filtration rate; HAIC, hepatic arterial infusion chemotherapy; HbA1c, glycated hemoglobin; HCC, hepatocellular carcinoma; HDL, High-density lipoprotein cholesterol; INR, International normalized ratio; IQR, interquartile range; IVC, inferior vena cava; LDL, Low-density lipoprotein cholesterol; MASH, Metabolic-dysfunction associated steatohepatitis, OAD, oral antidiabetic drug; RFA, radiofrequency ablation; PEI, percutaneous ethanol injection; TACE, trans-arterial chemo-embolization; TKI, tyrosine kinase inhibitor; Vp3, invasion of (or tumor thrombus in) first order branches of the portal vein; Vp4, invasion of (or tumor thrombus in) the main trunk of the portal vein and/or contra-lateral portal vein branch to the primarily involved lobe

**Table S2. Summary of immune-related adverse events**

| Events |  | | Diabetes (N = 68) | | | |
| --- | --- | --- | --- | --- | --- | --- |
| No diabetes  (N = 83) | | Well-controlled  (N = 37) | | Poorly-controlled  (N = 31) | |
|  | Any Grade | Grade 3 or 4 | Any Grade | Grade 3 or 4 | Any Grade | Grade 3 or 4 |
|  | *number (percent)* | | | | | |
| Cutaneous | 20 (24.1) | 3 (3.6) | 4 (10.8) | 0 (0.0) | 6 (19.4) | 0 (0.0) |
| Gastrointestinal | 16 (19.3) | 0 (0.0) | 9 (24.3) | 0 (0.0) | 8 (25.8) | 0 (0.0) |
| Hepatic | 2 (2.4) | 0 (0.0) | 2 (5.4) | 1 (2.7) | 1 (3.2) | 0 (0.0) |
| Endocrine | 2 (2.4) | 0 (0.0) | 1 (2.7) | 0 (0.0) | 1 (3.2) | 0 (0.0) |
| Cardiac | 1 (1.2) | 0 (0.0) | 0 (0.0) | 0 (0.0) | 1 (3.2) | 0 (0.0) |
| Pulmonary | 4 (4.8) | 0 (0.0) | 4 (10.8) | 0 (0.0) | 0 (0.0) | 0 (0.0) |
| Fatigue | 8 (9.6) | 0 (0.0) | 4 (10.8) | 0 (0.0) | 4 (12.9) | 0 (0.0) |
